# Supplementary material
Source: PubMed Central journal article supplement (PMC2784269)

Figure S1

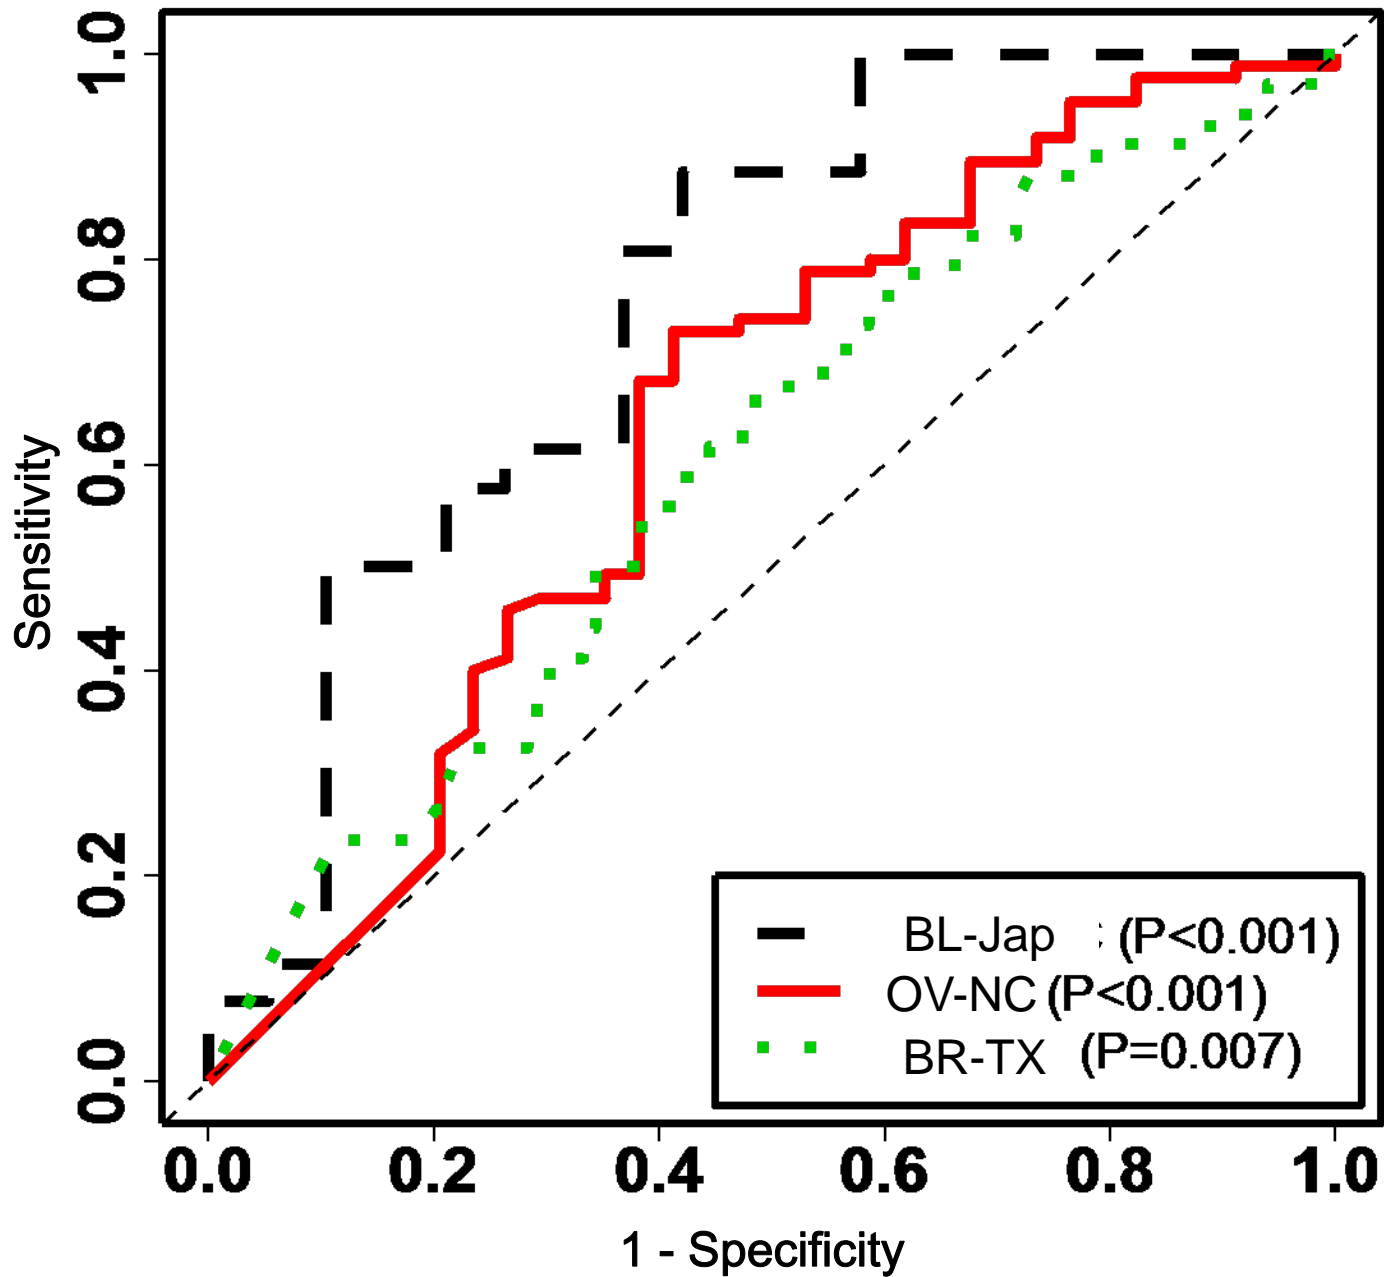

Invasive-trained BL-Jap

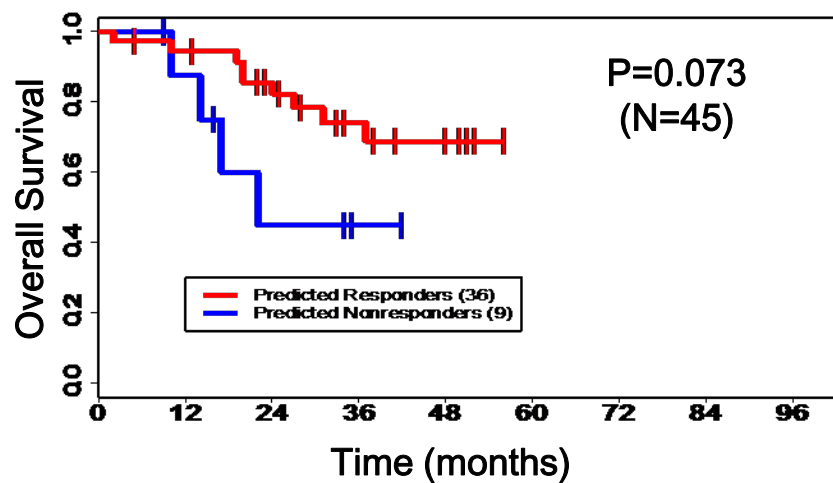

Superficial-trained BL-Jap

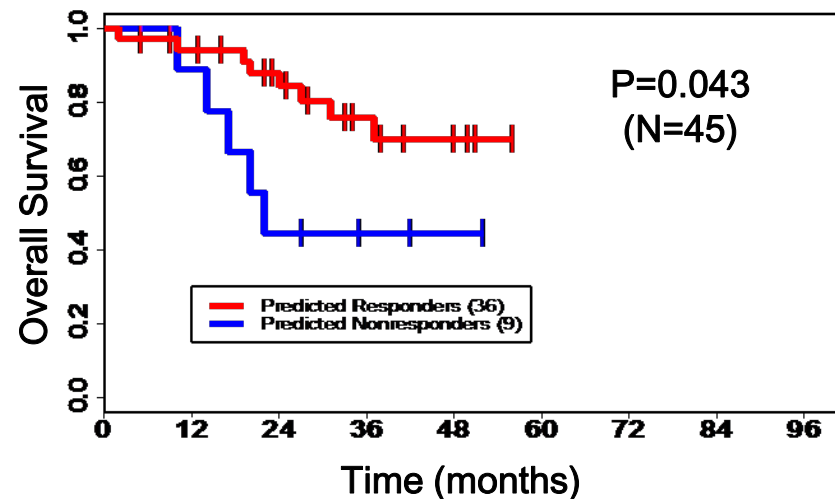

Invasive-trained BL-Den

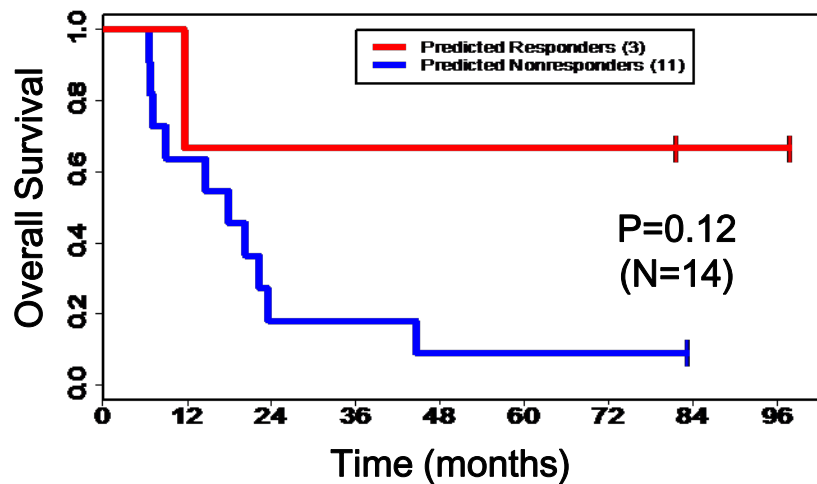

Superficial-trained BL-Den

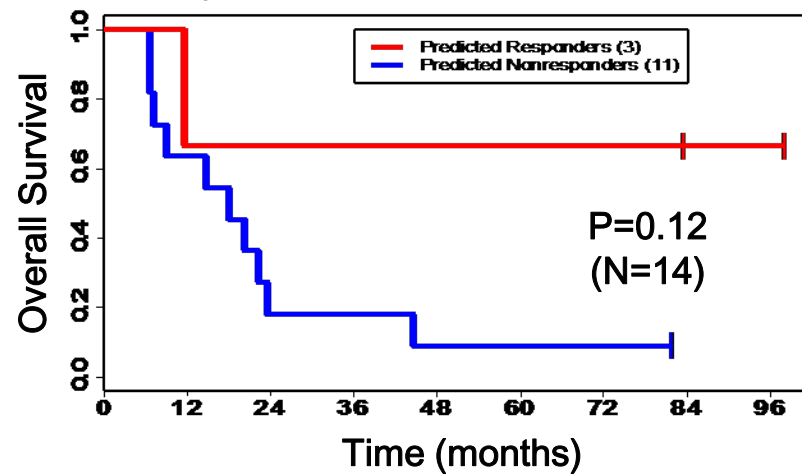

Supplement: NIHMS142973-supplement-2.pdf [file NIHMS142973-supplement-2.pdf]
